# Supplementary material
Source: publisher site journal article supplement (https://e-cmh.org/upload/media/cmh-2024-0042-Supplementary-Fig-3.pdf)
Supplement: Supplementary file 1 [file cmh-2024-0042-Supplementary-Fig-3.pdf]

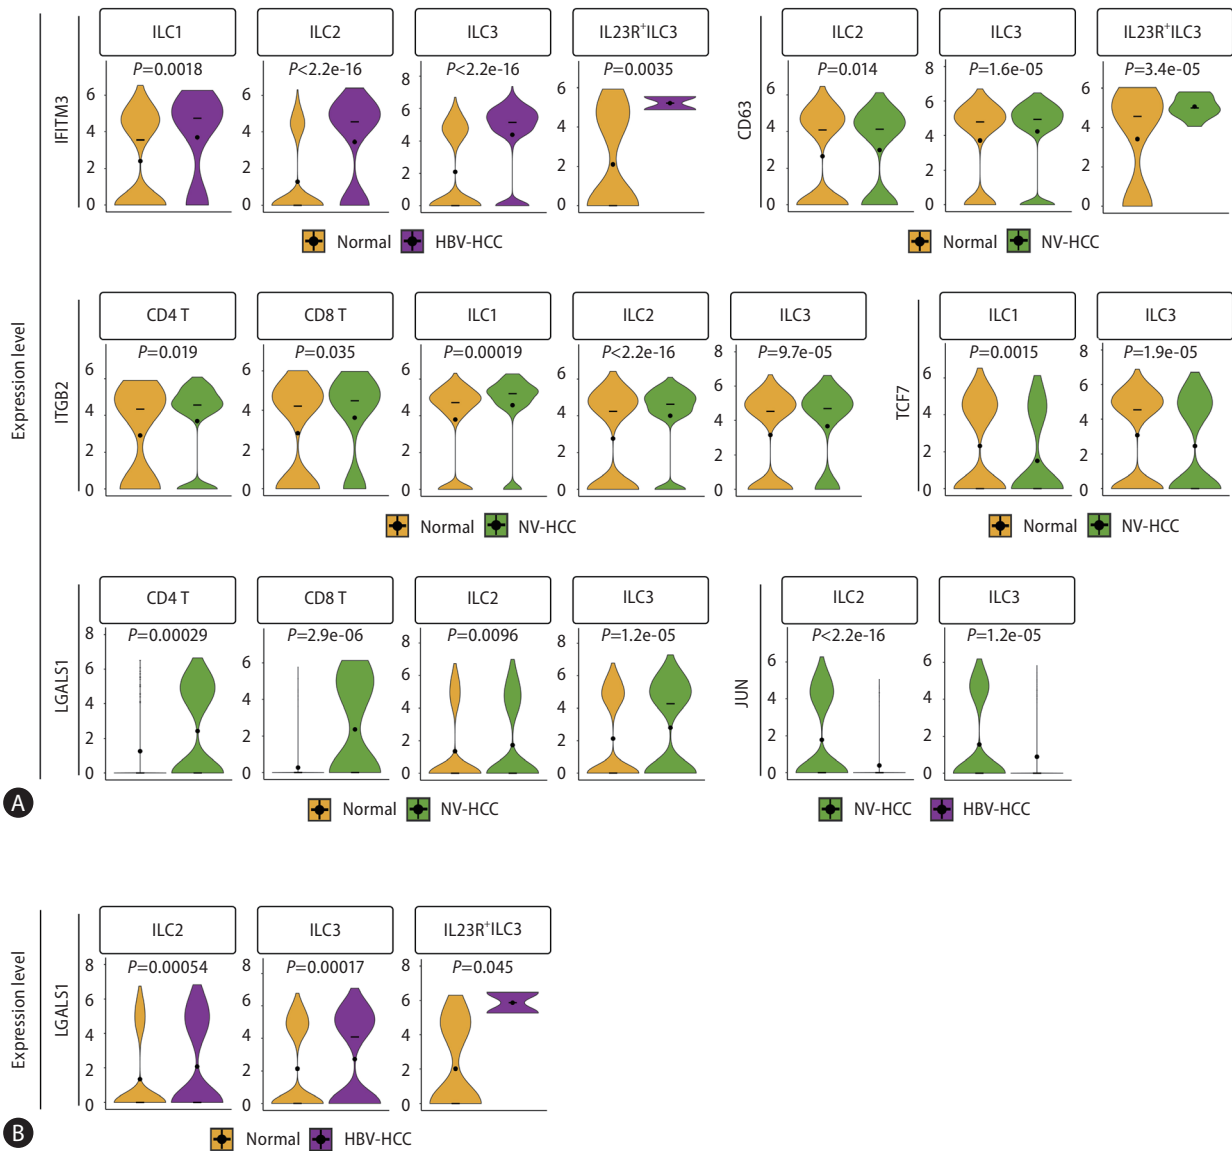

**Supplementary Figure 3.** Violin plots for DEG expression across different cell types. (A, B) Violin plots displaying the relative expression level of each significant DEG in each cell type. (A) DEGs from buffy coat WTS data. (B) DEGs from the buffy coat and plasma multiomics data. DEG, differentially expressed gene; WTS, whole-transcriptome sequencing.
